# Supplementary material
Source: HighWire-hosted journal article supplement (https://bmjopen.bmj.com/content/8/8/e022202)
Supplement: inline-supplementary-material-2 [file inline-supplementary-material-2.pdf]

Appendix B. Characteristics of the included studies

| Study             | Setting                                                         | Department                          | Design | Target                                                                                               | Intervention                                                        | Patient outcome                                                                                                                                                  |
|-------------------|-----------------------------------------------------------------|-------------------------------------|--------|------------------------------------------------------------------------------------------------------|---------------------------------------------------------------------|------------------------------------------------------------------------------------------------------------------------------------------------------------------|
| Haig (2006)       | OSF St. Joseph Medical Centre Bloomington, Illinois, U.S.       | All                                 | BAS    | Communication between clinicians (in verbal and written form)                                        | Educational program: all clinical staff                             | 1. Adverse patient events<br>2. Adverse drug events                                                                                                              |
| Christie (2009)   | South Devon Healthcare Foundation Trust, Tobay, United Kingdom  | All                                 | BAS    | Patient hand-off                                                                                     | Educational program: all clinical staff                             | 1. Hospital mortality<br>2. Adverse events<br>3. Cardiac arrests                                                                                                 |
| Andreoli (2010)   | Toronto Rehabilitation Institute, University of Toronto, Canada | Geriatric & musculo. rehabilitation | BAS    | Team communication (prevention of falls and management)                                              | Educational program: all clinical/non-clinical staff & unit leaders | 1. Incidence of Falls<br>2. Severity of falls (categorized in 4 levels: no harm, minor, moderate, major)                                                         |
| Field (2011)      | Nursing homes (n=26), State of Connecticut, U.S.                | -                                   | RCT    | Telephone communication between nurses and physicians anticoagulation management)                    | Educational program: all nursing staff                              | 1. INR values within the target range<br>2. Preventable adverse events related to warfarin-therapy                                                               |
| Freitag (2011)    | Rush Oak Park hospital, Oak Park, Illinois, U.S.                | All                                 | BAS    | Nursing hand-off (between shifts and units)                                                          | Interactive teaching: nursing staff, patient care technicians       | 1. Inpatient Fall Rate<br>2. Restrained Patients Rate<br>3. Catheter Associated UTI Rate                                                                         |
| Telem (2011)      | The Mount Sinai Hospital, New York, NY State, U.S.              | Surgery                             | CCT    | Physician hand-off (trained general surgery vs. untrained subspecialty surgery residents (n=20)      | Interactive teaching: residents, subspecialty residents as controls | Sentinel event (unexpected occurrence involving death or serious physical or psychological injury or the risk thereof and necessitating immediate investigation) |
| De Meester (2013) | Antwerp University Hospital, Antwerp, Belgium                   | All                                 | BAS    | Nursing hand-off (between shifts), Communication: deteriorating patients (nurses calling physicians) | Interactive teaching                                                | Serious adverse event (=unexpected occurrence involving death or ICU admission or call of the cardiac arrest team)                                               |

|                  |                                                                                                    |                 |     |                                                                                                   |                                                           |                                                                                                                                  |
|------------------|----------------------------------------------------------------------------------------------------|-----------------|-----|---------------------------------------------------------------------------------------------------|-----------------------------------------------------------|----------------------------------------------------------------------------------------------------------------------------------|
| Randmaa (2014)   | Country Council of Gävleborg, Sweden (University of Gävle)                                         | Anesthesiol.    | CCT | Communication in hospital (priority: physician and nurse hand-off)                                | Interactive teaching                                      | Adverse events with communication failure as a root cause                                                                        |
| Jarboe (2015)    | Nursing centre and rehabilitation facility (n.s.), southern Maryland, U.S.                         | -               | BAS | Communication between nurses and physicians (in notifying providers of change in resident status) | Educational session, integration into competency training | 1. Transfers to acute care hospitals<br>2. Types of transfers by clinical condition<br>3. Transfers resulting in hospitalisation |
| Pineda (2015)    | New Jersey hospital (n.s.),                                                                        | Medico-surgical | BAS | Nursing hand-off                                                                                  | Educational session                                       | Patient falls                                                                                                                    |
| Devereaux (2016) | Nursing/post-acute care facility (n.s.), performed by University of Pittsburgh, Pennsylvania, U.S. | -               | BAS | Communication between nurses and physicians (in notifying providers of change in patient status)  | Introduction of condition-specific SBAR                   | 1. Transfers to hospital<br>2. Hospitalisations<br>3. 30-day readmissions                                                        |

**Abbreviations:** BAS: Before-After-Study, CCT: Clinical Controlled Trial, CIRS: Critical Incident Reporting System, ICU: Intensive Care Unit, INR: International Normalised Ratio, MRSA: Methicillin-Resistant *Staphylococcus aureus*, n: number, n.s.: not specified, RCT: Randomised-Controlled Trial, SBAR: Subject Background Assessment Recommendation, U.S.: Unites States of America; UTI, Urinary Tract Infection.
