# Supplementary material
Source: HighWire-hosted journal article supplement (https://bmjopen.bmj.com/content/8/8/e022202)
Supplement: inline-supplementary-material-3 [file inline-supplementary-material-3.pdf]

Appendix C. Details of the implemented intervention

| Study           | Activities                                                                                                                                                                                                                                       | Objective(s)                                                                          | Who was trained?                                     | How many were trained? |
|-----------------|--------------------------------------------------------------------------------------------------------------------------------------------------------------------------------------------------------------------------------------------------|---------------------------------------------------------------------------------------|------------------------------------------------------|------------------------|
| Haig (2006)     | 1. Educational programs (class or video)<br>– Incorporation in several hospital programs<br>2. Trigger tools*<br>3. Organizational/human support:<br>– leadership (human and financial support)<br>– interdisciplinary spread team               | Communication between clinicians (in verbal and written form)                         | All clinical staff                                   | n.r.                   |
| Christie (2009) | 1. Interactive teaching<br>– simulated scenarios<br>2. Educational programs (class or video, 10-15min)<br>3. Trigger tools*<br>4. Organizational/human support<br>– project team (meetings fortnightly)<br>– SBAR as structure in trust meetings | Patient hand-off                                                                      | All clinical staff                                   | n.r.                   |
| Andreoli (2010) | 1. Interactive teaching<br>– role-playing (real-life case examples)<br>2. Educational programs (class or video, 4h)<br>3. Trigger tools*<br>4. Organizational/human support<br>– “SBAR champions”<br>– project team (weekly meetings)            | Team communication (for the priority issue of falls prevention and management)        | All clinical staff, non-clinical staff, unit-leaders | 85                     |
| Field (2011)    | 1. Educational programs (class or video)<br>– training (for one representative of each nursing home)<br>2. Trigger tools*<br>3. Organizational/human support<br>– calls with the representative of nursing home                                  | Telephone communication between nurses and physicians (in anticoagulation management) | Nursing staff                                        | n.r.                   |
| Freitag (2011)  | 1. Interactive teaching<br>– staff coaching within work (initial phase)<br>2. Educational programs (class or video, 1h)<br>3. Trigger tools*<br>4. Organizational/human support<br>– project team<br>– SBAR champion                             | Nursing hand-off (between shifts and units)                                           | Nursing staff, patient care technicians              | n.r.                   |

|                   |                                                                                                                                                                                                                                       |                                                                                                                       |                       |      |
|-------------------|---------------------------------------------------------------------------------------------------------------------------------------------------------------------------------------------------------------------------------------|-----------------------------------------------------------------------------------------------------------------------|-----------------------|------|
| Telem (2011)      | Interactive teaching (2,5h)<br>– video scenarios<br>– role-playing<br>– group discussions                                                                                                                                             | Physician hand-off                                                                                                    | General surgery staff | 45   |
| De Meester (2013) | 1. Interactive teaching (2-days, for 1-2 “reference nurse”/ward)<br>– group discussions, coaching<br>– role-playing<br>2. Training session (2h, for all nurses by „reference nurses“)<br>3. Educational programs (class or video, 4h) | Nursing hand-off (between shifts)<br><br>Communication in cases of deteriorating patients (nurses calling physicians) | Nursing staff         | n.r. |
| Randmaa (2014)    | 1. Interactive teaching<br>– role-playing<br>2. Trigger tools*<br>3. Organisational/human report<br>– active motivation to use SBAR in clinical practice                                                                              | Communication in hospital (priority physician hand-off & nurse hand-off)                                              | All clinical staff    | n.r. |
| Jarboe (2015)     | 1. Educational session (mandatory, 1h)<br>– training to use the SBAR communication tool<br>2. Organisational/human support<br>– policy change<br>– integration of SBAR into the annual nurse competency training                      | Communication between nurses and physicians (in notifying providers of change in resident status)                     | Nursing staff         | 66   |
| Pineda (2015)     | 1. Educational session<br>– four separate staff meetings<br>2. Organisational/human support<br>– integration of SBAR into nursing hand-off                                                                                            | Nursing hand-off (between shifts)                                                                                     | Nursing staff         | n.r. |
| Devereaux (2016)  | Introduction of condition-specific SBARs for the most common reasons for transfer to acute care hospitals                                                                                                                             | Communication between nurses and physicians (in notifying providers of change in resident status)                     | Nursing staff         | 60   |

**Abbreviations:** FA, First author, h: hour(s), m: month(s), min: minute(s), n: number, n.r.: not reported, SBAR: Subject Background Assessment Recommendation
