# Supplementary material
Source: HighWire-hosted journal article supplement (https://bmjopen.bmj.com/content/8/8/e022202)
Supplement: inline-supplementary-material-4 [file inline-supplementary-material-4.pdf]

Appendix D. Details of the results

| Objective/<br>Study                            | Patient outcome (PO)                                                         | PO collection                                                                             | Duration of PO<br>measurement | Results detail                                                                                                                                                                                                                                                   |
|------------------------------------------------|------------------------------------------------------------------------------|-------------------------------------------------------------------------------------------|-------------------------------|------------------------------------------------------------------------------------------------------------------------------------------------------------------------------------------------------------------------------------------------------------------|
| <b>Team communication in general</b>           |                                                                              |                                                                                           |                               |                                                                                                                                                                                                                                                                  |
| Haig (2006)                                    | Adverse patient events<br>Adverse drug events                                | Retrospective chart review (each month 20 randomly selected charts)                       | Pre: 1m<br>Post: 12m          | Decrease: 90 to 49 per 1,000 patient days <sup>#</sup><br>Decrease: Events from 30 to 18 per 1,000 patient days <sup>#</sup>                                                                                                                                     |
| Andreoli (2010)                                | Falls incidence<br>Falls severity (4 levels)<br>Near-miss reporting          | Retrospective chart review + "safety reporting" (by an online reporting system)           | n.r.                          | Total falls showed an increasing trend on the study teams <sup>#</sup><br>Decreasing trend across major falls (4 vs. 2) both the organization and the study units <sup>#</sup><br>Decreasing trend across both the organization and the study units <sup>#</sup> |
| <b>Patient hand-off – nurses</b>               |                                                                              |                                                                                           |                               |                                                                                                                                                                                                                                                                  |
| Freitag (2011)                                 | Inpatient Fall Rate<br>Restrained Patients Rate<br>Catheter Associated UTI   | Retrospective chart review                                                                | n.r.                          | Reduction of 5% <sup>#</sup><br>Reduction of 31% <sup>#</sup><br>Reduction of 34% <sup>#</sup>                                                                                                                                                                   |
| Pineda (2015)                                  | Patient falls                                                                | n.s.                                                                                      | Pre: 1m<br>Post: 1m           | 2 falls (pre) vs. 0 falls (post) <sup>#</sup>                                                                                                                                                                                                                    |
| <b>Patient hand-off – physician</b>            |                                                                              |                                                                                           |                               |                                                                                                                                                                                                                                                                  |
| Telem (2011)                                   | Sentinel events                                                              | Morbidity and mortality surgical database and hospital performance improvement initiative | Pre: 1m<br>Post: 1m           | No statistical significant difference in sentinel events, general surgical vs. surgical subspecialty interns (one sentinel event)                                                                                                                                |
| <b>Patient hand-off – physician and nurses</b> |                                                                              |                                                                                           |                               |                                                                                                                                                                                                                                                                  |
| Randmaa (2014)                                 | CIRS events (communication errors)                                           | Prospective analysis of "safety reports" (=CIRS)                                          | Pre: 12m<br>Post: 12m         | Decrease from 31% to 11%, p<0.0001                                                                                                                                                                                                                               |
| Christie (2009)                                | Hospital mortality<br>Adverse events<br>Cardiac arrests<br>MRSA bacteraemias | n.s.                                                                                      | n.r.                          | 11% reduction in hospital mortality <sup>#</sup><br>65% reduction of adverse events <sup>#</sup><br>8% reduction of cardiac arrests <sup>#</sup><br>83% reduction of MRSA bacteraemia <sup>#</sup>                                                               |

| <b>Telephone communication from nurse to doctor – anticoagulation management</b>               |                                                                                                                                          |                                                                                                        |                                                                |                                                                                                                                                                                                                                                    |
|------------------------------------------------------------------------------------------------|------------------------------------------------------------------------------------------------------------------------------------------|--------------------------------------------------------------------------------------------------------|----------------------------------------------------------------|----------------------------------------------------------------------------------------------------------------------------------------------------------------------------------------------------------------------------------------------------|
| Field (2011)                                                                                   | INR values within the target range (2.0 - 3.0)<br><br>Preventable AE related to warfarin-therapy                                         | Quarterly reviews of nursing home records by pairs of physician-reviewers                              | 55,167 resident days (intervention homes) vs. 53,601 (control) | 4.5% more time in the therapeutic range than in control homes (95% CI: 0.3%-8.7%)<br><br>Statistically non-significant reduction, odds ratio 0.9 (95% CI: 0.5-1.4)                                                                                 |
| <b>Telephone communication from nurse to doctor – Deteriorating/status change of a patient</b> |                                                                                                                                          |                                                                                                        |                                                                |                                                                                                                                                                                                                                                    |
| De Meester (2013)*                                                                             | Unexpected death<br><br>ICU admission<br><br>Call of cardiac arrest team                                                                 | Retrospective analysis of medical records and internal emergency calls (performed by a trained expert) | Pre: 10m<br><br>Post: 10m                                      | Significant decrease from 0.99 to 0.34/1000 admissions (RRR = -227%, 95% CI = -793 to -20; p < 0.001)<br><br>Significant increase from 13.1 to 14.8/1000 admissions (RRR = 50%, 95% CI: 30-64%, p=0.001)<br><br>No significant difference (p>0.05) |
| Jarboe (2015)                                                                                  | Transfers to acute care hospitals<br><br>Types of transfers by clinical condition criteria<br><br>Transfers resulting in hospitalization | n.s.                                                                                                   | Pre: 12m<br><br>Post: 8m                                       | No significant difference (p = 0.482)<br><br>No significant difference in i) preventable transfer group, p=0.927 or ii) emergent transfer group, p=0.565<br><br>No significant difference (p = 0.662)                                              |
| Devereaux (2016)                                                                               | 30-day readmissions<br><br>Transfers to hospital<br><br>Avoidable hospitalisations                                                       | n.s.                                                                                                   | Pre: 3m<br><br>Post: 3m                                        | Significant reduction, 0.12 vs. 0.04, p=0.012<br><br>Significant reduction, 0.44 vs. 0.24, p<0.001<br><br>Significant reduction, 0.15 vs. 0.05, p=0.007                                                                                            |

**Abbreviations:** CI, confidence interval, month(s), ICU: Intermediate Care Unit, n: number, n.r.: not reported, pre/post: duration of outcome measurement pre/post intervention, RRR: Relative Risk Reduction, SBAR: Subject Background Assessment Recommendation, vs.: versus
